# Supplementary material for: 1,4-Naphthoquinone Triggers Nematode Lethality by Inducing Oxidative Stress and Activating Insulin/IGF Signaling Pathway in Caenorhabditis elegans
Source: PubMed Central journal article supplement (PMC6154497; doi:10.3390/molecules22050798), 2017-05-13
Supplement: molecules-22-00798-s001.pdf [file molecules-22-00798-s001.pdf]

**Table S1.** Primer sequence

| Gene name                 | Primer sequence                                |
|---------------------------|------------------------------------------------|
| <i>act-1</i>              | f: 5'-GTGTGACGACGAGGTGCCGCTCTTGTGTAGAC-3'      |
|                           | r: 5'-GGTAAGGATCTTCATGAGGTAATCAGTAAGATCAC-3'   |
| <i>age-1 (B0334.8)</i>    | f: 5'-TCCTTGTTACCTTGATGCTCGGA-3'               |
|                           | r: 5'-TTGACTGCGTGGAAGAGCCAATTC-3'              |
| <i>sod-3</i>              | f: 5'-GCTGCAATCTACTGCTCGCACTGCTTCAAAGC-3'      |
|                           | r: 5'-GGCAAATCTCTCGCTGATATTCTCCAGTTGGC-3'      |
| <i>mtl-1</i>              | f: 5'-ATGGCTTGCAAGTGTGACTGCAAAAACAAGC-3'       |
|                           | r: 5'-TTAATGAGCCGCAGCAGTTCCTGGTGTIGATGGG-3'    |
| <i>ctl-2 (Y54G11A.5)</i>  | f: 5'-ACTTCGCTGAGGTTGAACAATCCG-3'              |
|                           | r: 5'-TTTGGTCCAAGGCGGTGAAATGA-3'               |
| <i>daf-12 (F11A1.13a)</i> | f: 5'-TCCAATGCCAGCTGAAACAACACC-3'              |
|                           | r: 5'-TGGAATGGCTGACACGGTTGAATG-3'              |
| <i>hsf-1</i>              | f: 5'-GCGGCTCCGTATAAGAATGCGACTAGGC-3'          |
|                           | r: 5'-TTAAACCAAATTAGGATCCGATGGACTTGGAGTAC-3'   |
| <i>hsp-16.1</i>           | f: 5'-GTCACTTTACCACTATTTCCGTCCAGCTCAACGTTTC-3' |
|                           | r: 5'-CAACGGGCGCTTGCTGAATTGGAATAGATCTTCC-3'    |
| <i>hsp-16.49</i>          | f: 5'-GCTCATGCTCCGTTCTCCATATTCTGATTCAAATGC-3'  |
|                           | r: 5'-GCAACAAAATTGATCGGAATAGAACGTGATGAG-3'     |
| <i>sip-1</i>              | f: 5'-ATGTCTTCTCTGCCCATACACTGGCCG-3'           |
|                           | r: 5'-TTAGTGCTTCCGGTGGTGGTGGTGGTGG-3'          |
| <i>daf-21 (C47E8.5)</i>   | f: 5'-ACCTTGAACCATTGCCAAGTCTG-3'               |
|                           | r: 5'-ATCGGCGACAAGGAAAGCAGAGTA-3'              |
